1 Title: Preparation of DPPC liposomes using probe-tip sonication: investigating intrinsic factors  
2 affecting temperature phase transitions.

3 Authors: Monica D. Rieth\* and Andrew Lozano

4 Address: Department of Chemistry, Southern Illinois University Edwardsville, 44 South Circle Drive,  
5 Edwardsville, Illinois 62026, U.S.A.; Phone: 618-650-3561; email: [mrieth@siue.edu](mailto:mrieth@siue.edu)

6 \*corresponding author

7

8

9

10

11

12

13

14

15

16

17

18

19

20

21

22

23

24

25

26

27

28

29

30

31

32 **Abstract**

33 Liposomes are an important tool and have gained much attention for their promise as an effective means of  
34 delivering small therapeutic compounds to targeted sites. In an effort to establish an effective method to  
35 produce liposomes from the lipid, dipalmitoyl-phosphatidylcholine or DPPC, we have found important  
36 aspects that must be taken into consideration. Here, we used probe-tip sonication to prepare liposomes on  
37 a batch scale. During this process we uncovered interesting steps in their preparation that altered the  
38 thermodynamic properties and phase transitions of the resulting liposome mixtures. Using differential  
39 scanning calorimetry to assess this we found that increasing the sonication time had the most dramatic  
40 effect on our sample, producing almost an entirely separate phase transition relative to the main phase  
41 transition. This result is consistent with reports from the current literature. We also highlight a smaller  
42 transition, which we attribute to traces of unincorporated lipid that seems to gradually disappear as the total  
43 lipid concentration decreases. Overall, sonication is an effective means of producing liposomes, but we  
44 cannot assert this method is optimal in producing them with precise physical properties. Here we highlight  
45 the physical effects at play during this process.

46

47

48

49

50

51

52

53

54

55

56

## 57 **Introduction**

58 Liposomes are bilayered nanostructures typically comprised of phospholipids that can have variable  
59 properties, which ultimately influence the larger nanostructures they make up. Small peptides, nucleic acids  
60 and polymer-based materials can also be doped in to create liposomes with unique features making them  
61 adaptable for specific applications like drug delivery or other uses that require them to be stable.<sup>1-5</sup> Other  
62 factors like pH, temperature and ionic strength can also play a role in affecting their inherent stability.<sup>6-10</sup>  
63 They are also used as an effective tool in molecular biology to facilitate organism transformation and  
64 transfection with foreign DNA or RNA.<sup>11-14</sup>

65 In solution, methods like extrusion, sonication, and rapid ethanol injection have been used to successfully  
66 prepare liposomes.<sup>15-17</sup> They can also be prepared from thin films and other synthetic supports.<sup>18,19</sup> The  
67 application of each technique can influence the final physical properties including size (diameter),  
68 lamellarity (single bilayer or multi-bilayer), polydispersity (range of sizes), and zeta potential (surface  
69 charge) to name a few.<sup>5,17,20,21</sup> In this study we used differential scanning calorimetry, DSC, as a means of  
70 assessing the thermal stability and phase transitions of liposomes prepared from a single lipid to help  
71 establish the parameters that are critical for their reproducibility by probe-tip sonication. DSC has  
72 previously been reported as a useful tool in studies assessing liposome stability. We chose this method  
73 because it is accepted as a means of evaluating liposome stability. We investigated three parameters in the  
74 development toward establishing a robust method of liposome preparation, which will later be employed  
75 for downstream applications. Upon investigating these parameters, we found that the quantity of lipid used  
76 for sample preparation and the total sonication time significantly affected the transition state temperature  
77 and overall sample stability, which is defined herein by a decrease in the melting temperature transition  
78 state compared to a defined standard and previously reported values in the literature. Our analysis stems  
79 from the creation and optimization of a consistent and reliable method to prepare pure DPPC liposomes,  
80 1,2-dipalmitoyl-*sn*-glycero-3-phosphocholine, using probe-tip sonication. We chose to use DPPC because  
81 it is a relatively well-characterized lipid to which we could readily compare our results. The over-arching

82 aim of this work is to use the insights generated from this investigation to reliably produce liposomes for  
83 the capture of small molecule compounds.

## 84 **Materials and Methods**

### 85 *Sample preparation and DSC measurements*

86 The saturated lipid, 1,2-dipalmitoyl-sn-glycero-3-phosphocholine (DPPC), was purchased from Avanti  
87 Polar Lipids (cat.# 850355, Alabaster, AL) and used without further purification. DPPC was weighed out  
88 to a mass of 2.0, 5.0, 10.0, and 25.0 mg. The lipids were transferred to a 2.0 mL glass vial to which 1 mL  
89 of buffer (20 mM HEPES pH 7.4, 100 mM NaCl) was added. The final volume did not exceed 1.0 mL.  
90 Samples were vortexed briefly to mix which resulted in a milky white suspension containing larger white  
91 particulates. To generate liposomes, the mixtures were sonicated using a probe-tip sonic dismembrator  
92 equipped with a microtip adapter (Fisher Scientific, Hampton, NH) set to 20% duty cycle (relative pulse  
93 intensity) with a pulse length time of 2 seconds and a rest period of 5 seconds for a total of 4 minutes. This  
94 cycle was carried out a total of three times on each sample to prevent excessive heating. The liposome  
95 solutions were then transferred to a 2 mL Eppendorf tube and centrifuged using a microcentrifuge,  
96 (Eppendorf, Model 5424) at 10,000 rpm for 3 minutes to remove titanium particles introduced during  
97 sonication. The supernatant was then transferred to another 2 mL Eppendorf tube. Samples were stored  
98 overnight at 4 °C and DSC studies were carried out the following day. Samples were not stored longer than  
99 16-20 hours in advance of the DSC studies to preserve sample integrity and minimize liposome degradation.  
100 Stored liposome samples were removed from the refrigerator and left to equilibrate at room temperature for  
101 at least one hour. The samples were centrifuged at 10,000 rpm for an additional 3 minutes and the  
102 supernatant was carefully transferred to a clean 2.0 mL Eppendorf tube. All samples and buffer were  
103 degassed for approximately 30 minutes and the buffer was filtered prior to sample preparation using a 0.2  
104 µm syringe filter.

105 DSC measurements were carried out on a VP-DSC high sensitivity scanning calorimeter (MicroCal,  
106 Northampton, MA, USA). All samples were scanned at a rate of 60 °C / hr from 20 °C to 70 °C. Samples  
107 were pre-equilibrated for five to ten minutes at 20 °C (room temperature) prior to the initial scan. To avoid  
108 the possibility of irreversible degradation, one scan per sample was obtained and replicates were carried  
109 out on freshly prepared samples.

#### 110 *Changes in DSC temperature scan rates*

111 Briefly, two samples were prepared at 5.0 mg / mL and each was sonicated using the probe-tip sonicator  
112 set to 20% duty cycle with a pulse length time of 2 seconds and a rest period of 5 seconds for a total of 4  
113 minutes. This was repeated a total of three times for the two samples for a total of 12 minutes. The samples  
114 were centrifuged and stored overnight at 4 °C. DSC studies were carried out the following day.

115 DSC measurements were carried out as described above on each sample. The samples were scanned from  
116 20 °C to 70 °C at a rate of 30 °C / hr and 60 °C / hr. Samples were pre-equilibrated for five to ten minutes  
117 at 20 °C prior to the initial scan.

#### 118 *Varying the sonication time during liposome preparation*

119 DPPC liposomes were prepared at a total lipid composition of 25.0 mg / mL. Five samples were weighed  
120 out to a mass of 25.0 mg. The lipids were transferred to a 2.0 mL glass vial and 1 mL of buffer was added.  
121 To generate liposomes, the mixtures were sonicated with the probe-tip sonicator for 6, 12, 20, 28, and 36  
122 minutes set to 20% duty cycle with a pulse length time of 2 seconds and a rest period 5 seconds for a total  
123 of 4 minutes. This was repeated one and a half times for the 6-minute sample, three times for the 12-minute  
124 sample, five times for the 20-minute sample, seven times for the 28-minute sample, and nine times for the  
125 36-minute sample. To avoid excessive heating the samples were rotated through one sonication cycle after  
126 4 minutes. A 14-minute rest was introduced in between the last two cycles for the 36-minute sample to  
127 avoid excessive heating. The DPPC liposome solutions were then transferred to a 2 mL Eppendorf tube  
128 and centrifuged using a microcentrifuge (Eppendorf, Model 5424) at 10,000 rpm for 3 minutes to remove

129 titanium particles introduced during sonication. The supernatant was transferred to a new 2 mL Eppendorf  
130 tube and samples were stored overnight at 4 °C. DSC measurements were carried out the following day.  
131 Samples were not stored longer than 16-20 hours prior to carrying out the DSC measurements to preserve  
132 sample integrity and minimize liposome degradation. The stored liposome samples were removed from  
133 the refrigerator, left to equilibrate at room temperature for at least one hour, centrifuged at 10,000 rpm for  
134 3 minutes and degassed along with buffer for 30 minutes.

135 DSC measurements were carried out as described with a scanning temperature rate of 60 °C / hr beginning  
136 at 20 °C and ending at 70 °C. Samples were pre-equilibrated for five to ten minutes at 20 °C prior to the  
137 initial scan.

138 After each measurement the raw tabulated data was imported to KaleidaGraph version 4.5 (Synergy,  
139 Reading, PA) and plotted. Baseline subtraction was carried out manually prior to generating thermograms  
140 and extracting the thermodynamic properties. The main phase transition temperature ( $T_m$ ) was extracted  
141 and the peak morphology in each thermogram was analyzed for changes in the main phase transition  
142 temperature. Peaks arising from additional phase transitions were reported and summarized along with  
143 their thermodynamic parameters.

## 144 **Results**

145 DPPC liposomes were prepared using probe-tip sonication, one of several methods that is commonly  
146 used. Liposome samples were prepared at 2.0, 5.0, 10.0, 25.0 mg/mL and DSC measurements were carried  
147 out. In all of the samples, a major temperature transition peak appears at approximately 41.0 °C, which is  
148 consistent with what has been previously reported for DPPC liposomes (Figure 1).<sup>22</sup> A secondary transition  
149 peak begins to appear immediately before the main peak close to 38.0 °C. This secondary peak becomes  
150 increasingly noticeable as the lipid concentration increases above 5 mg / mL (Figure 1), although, when we  
151 lower the rate of the temperature scan we see an enhanced resolution of this secondary transition (Figure  
152 2A).

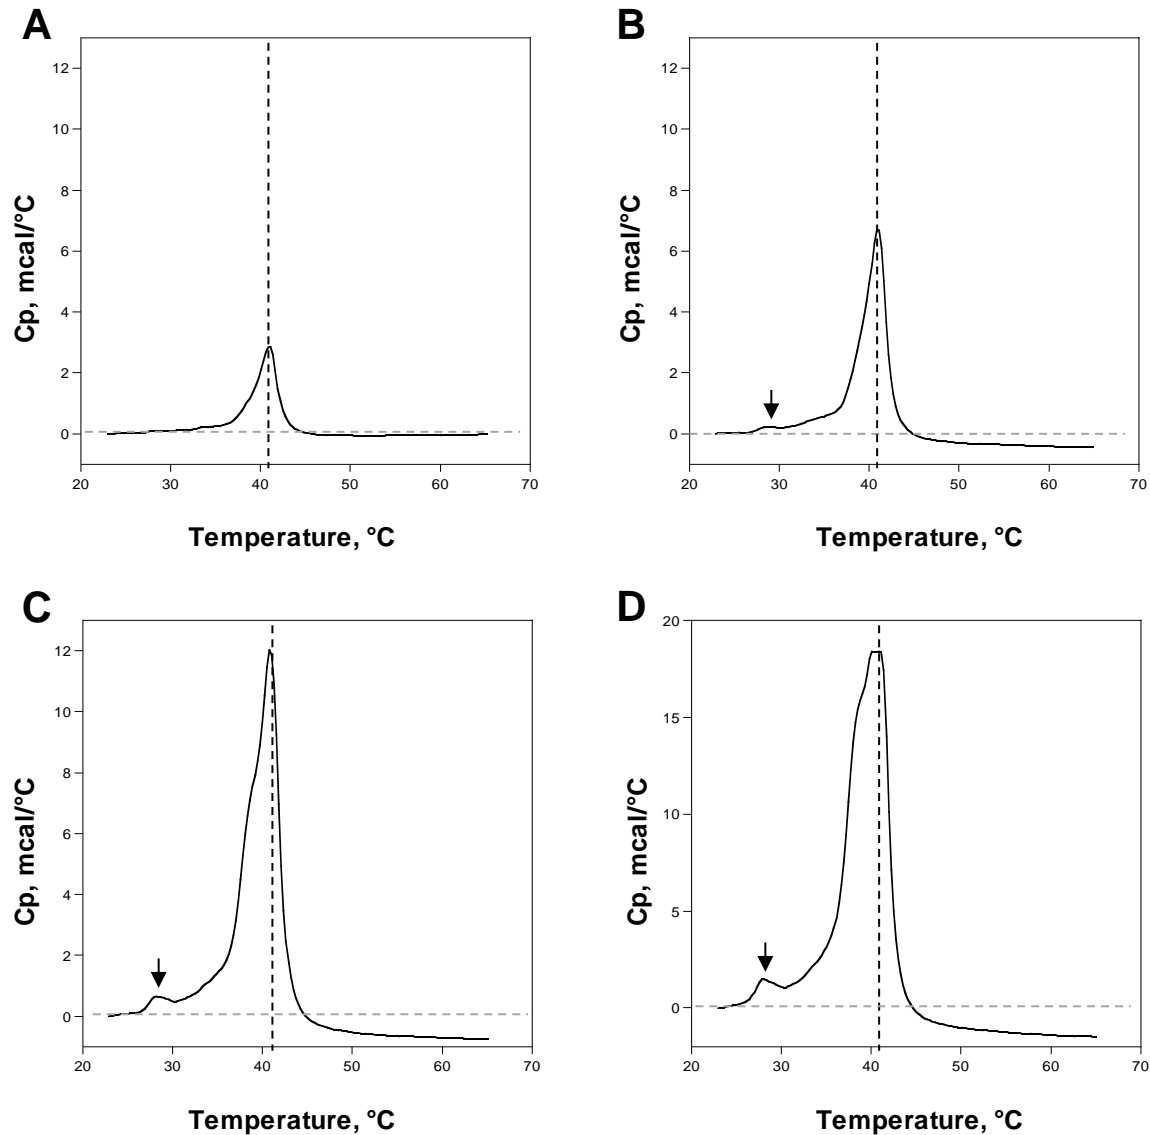

153

**Figure 1.** DSC thermograms of DPPC liposome samples prepared with A) 2.0 mg / mL, B) 5.0 mg / mL, C) 10.0 mg / mL, and D) 25.0 mg / mL. The curves have been normalized to zero and the major peak at approximately 41.0 °C is denoted by the dotted line. The small peak at approximately 27.0 °C denoted by the black arrow can be attributed to unincorporated lipid. All scans were performed at 60 °C / hr.

156 We attribute this secondary temperature transition to the formation of another type of liposome population  
157 altogether, though, the appearance of this peak has been previously reported as a “pre-transition” peak prior  
158 to the main phase transition. This behavior has also been previously described for polymorphic  
159 mixtures.<sup>23,24</sup> The secondary peak (Table 1 - minor peak) became more readily apparent when the  
160 temperature was increased more gradually at 30 °C / hr compared to 60 °C / hr (Figure 2).

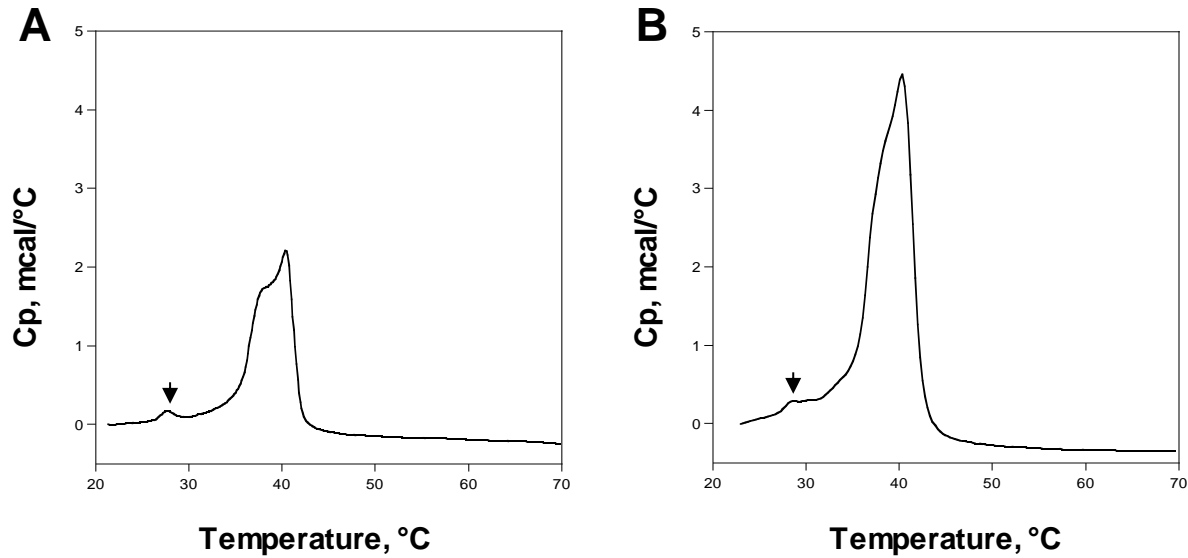

161

**Figure 2.** DSC thermogram of DPPC liposome samples prepared at 5.0 mg / mL. A) scanned at 30 °C / hr, B) scanned at 60 °C / hr. A subtle shoulder is present in both samples but becomes more apparent when the temperature scan rate is decreased by half.

162 In nearly all of the samples a small peak is also readily apparent at 27.0 °C (denoted by the small black  
163 arrow), but is only slightly detected at concentrations below 5 mg / mL (Figure 1). We attribute this to  
164 unincorporated lipid that could not be removed by centrifuging after sonication. Next, we altered the total  
165 sonication time for five samples. The sonication time ranged from 6 to 36 minutes. Interestingly, the  
166 secondary peak that emerged from the previous experiment becomes remarkably more pronounced when  
167 the sonication time was increased to 36 minutes and we believe this may be attributed to a phase transition  
168 arising from a distinct new liposome species that was not present before (Figure 3). This secondary peak,  
169 again, appears between  $T_m = 38.4-38.9$  °C, which is similar to what we see in Figures 1 and 2. The small  
170 peak between 27.0-29.0 °C is still present in each of the samples, which were all prepared with 25.0 mg /  
171 mL DPPC and scanned at a rate of 60 °C / hr.



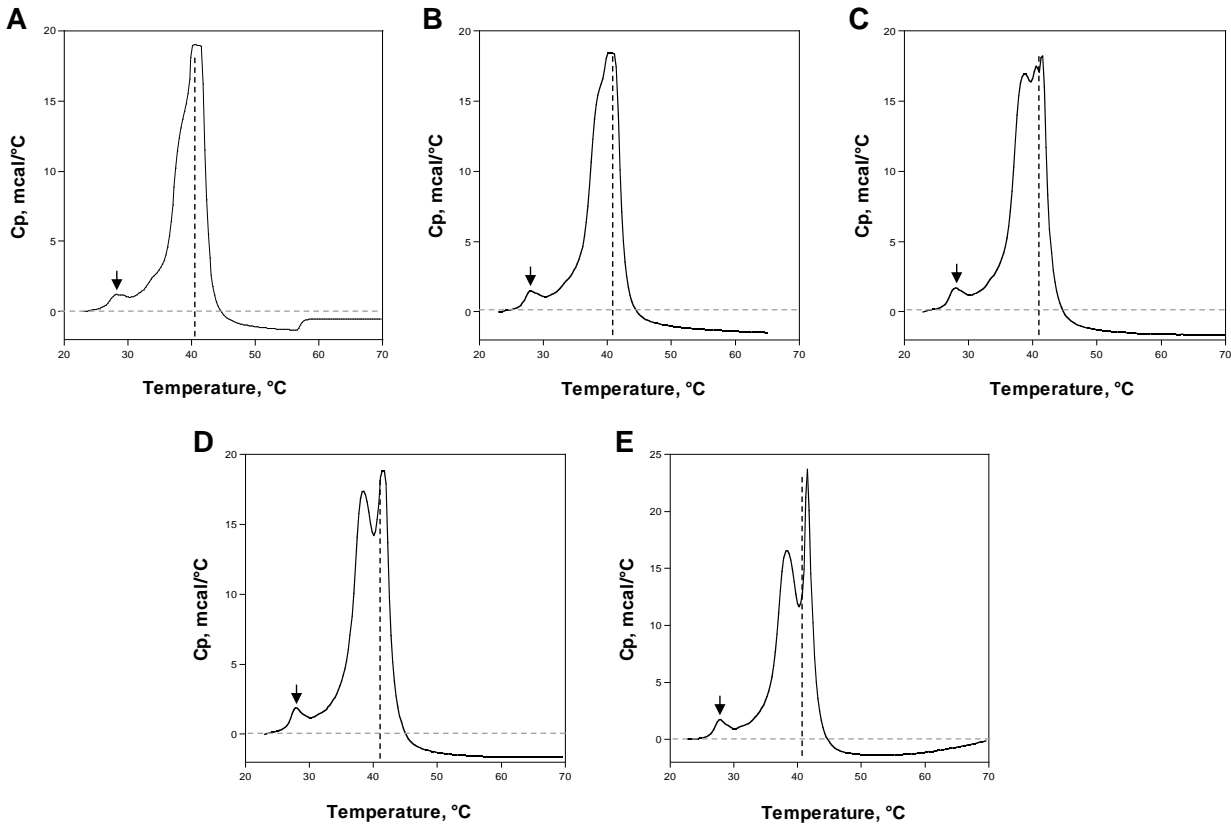

172

**Figure 3.** DSC thermogram of DPPC liposome prepared at different total sonication times, A) 6 minutes, B) 12 minutes, C) 20 minutes, D) 28 minutes, E) 36 minutes. The transition temperature introduced by unincorporated lipid is denoted by the small arrow. All scans were performed at 60 °C / hr with 25.0 mg / mL DPPC.

173 The thermodynamic data from each DSC thermogram is summarized in Table 1 and shows the melting  
174 temperature at each major phase transition,  $T_m$ , for the lipid species in each thermogram. The heat capacity,  
175  $C_p$ , along with total calorimetric enthalpy,  $H_{cal}$ , is also reported. Molar heat capacity and enthalpy were  
176 omitted due to the inherent inaccuracy of this prediction based on observations of reported lipid loss after  
177 sonication. Results are summarized and enthalpy is reported in both millicalories and in Joules. In all  
178 samples the major temperature phase transition occurred between 40.1 and 40.8 °C, which is consistent  
179 with what has been previously reported.

180

181

**Table 1. Summarized thermodynamic data extracted from DSC thermograms**

|               | <b>Liposome conditions</b> | <b>T<sub>m</sub> (°C) major</b> | <b>T<sub>m</sub> (°C) minor</b> | <b>H<sub>cal</sub>, mcal (Joules) x 10<sup>-4</sup> total</b> | <b>C<sub>p</sub> (mcal/°C) total</b> |
|---------------|----------------------------|---------------------------------|---------------------------------|---------------------------------------------------------------|--------------------------------------|
| <b>Fig. 1</b> | Panel A                    | 41.1                            | ---                             | 10.65<br>(0.46)                                               | 2.86                                 |
|               | Panel B                    | 40.8                            | ---                             | 24.82<br>(1.05)                                               | 6.70                                 |
|               | Panel C*                   | 40.8                            | 38.9                            | 53.44<br>(2.22)                                               | 12.03                                |
|               | Panel D*                   | 40.1                            | 38.8                            | 105.67<br>(4.19)                                              | 18.39                                |
| <b>Fig. 2</b> | Panel A*                   | 40.5                            | 38.1                            | 10.61<br>(0.44)                                               | 2.21                                 |
|               | Panel B*                   | 40.4                            | 38.5                            | 23.91<br>(1.01)                                               | 4.45                                 |
| <b>Fig. 3</b> | Panel A*                   | 41.0                            | 38.9                            | 104.67<br>(4.38)                                              | 18.99                                |
|               | Panel B*                   | 40.1                            | 38.8                            | 105.67<br>(4.42)                                              | 18.39                                |
|               | Panel C*                   | 41.6<br>(40.5)                  | 38.9                            | 117.26<br>(4.91)                                              | 18.21                                |
|               | Panel D*                   | 41.4                            | 38.5                            | 122.43<br>(5.13)                                              | 18.81                                |
|               | Panel E*                   | 41.6                            | 38.4                            | 114.58<br>(4.80)                                              | 23.70                                |

182 \*In all cases a small peak at approximately 27.0 °C is readily detected and can be attributed to trace amounts of unincorporated lipid. The  
 183 minor peak has also been previously reported for DPPC liposomes and is referred to as a “pre-transition” phase immediately preceding the  
 184 main phase transition at approx. 41.0 °C.<sup>25</sup>

## 185 Discussion

186 In the preparation of liposome mixtures, thermal stability is often an important parameter to consider,  
 187 especially when attempting to prepare samples for downstream applications. The methods used to prepare  
 188 liposomes can often have important consequences and ultimately must be considered when attempting to  
 189 establish reproducible methods for producing a well-defined, homogeneous population with specified  
 190 properties.<sup>16</sup> Differential scanning calorimetry, DSC, is an accepted means of assessing the thermal stability  
 191 and we chose to implement this method in the current study.<sup>23,26,27</sup> Based on the method of probe-tip  
 192 sonication, we further investigated parameters to determine which factors had the greatest influence on our  
 193 liposome preparations. Though at first varying these parameters seemed trivial, the results from the analysis

194 suggest otherwise and show these factors give rise to additional phase transitions, which we might not have  
195 otherwise predicted. Though there are other ways to prepare liposomes, this method is currently under  
196 development toward an established, reliable method from which additional experiments can be carried out.  
197 Although probe-tip sonication is relatively straightforward it is not the optimal method for producing  
198 liposomes with uniform properties. For example, lamellarity (unilamellar vs. multilamellar) and size (nm)  
199 can be drastically affected by the method of preparation.<sup>18,20,28</sup> To produce liposomes with uniform size  
200 and lamellarity (single-bilayer or unilamellar) extrusion is often a favorable choice, however, the over-  
201 extending goals of our work are to explore the utility of liposome mixtures in capturing environmental  
202 compounds. To that end, producing liposomes with ultra-precise characteristics becomes less important  
203 compared to establishing the most ideal method based on our goals. While preparing our samples, we  
204 discovered interesting parameters that affected the thermal stability and observed changes in the phase  
205 transition of pure DPPC liposomes. To capture additional, though subtle, transition states it was more  
206 effective to increase the temperature gradually at 30 °C / hr for each DSC measurement, which increased  
207 peak resolution in the thermograms (Figure 2). Variations in sonication time were implemented to  
208 determine if this affected the overall thermal stability of the mixture and was motivated by our observation  
209 that there was substantial lipid loss after sonication. To ensure complete incorporation of all lipid material  
210 we tested variations in sonication time. Our standard practice describes a total sonication time of 12 minutes  
211 with a rest period introduced after 4 minutes to allow the sample to sufficiently cool and prevent  
212 overheating. Sample overheating can lead to lipid degradation which can affect the final properties of the  
213 liposomes, so it was important to carefully monitor samples for increases in temperature while extending  
214 the sonication time.<sup>29</sup> Conversely, samples could not be chilled as a measure to prevent overheating during  
215 sonication else we introduce the risk of creating conditions whereby DPPC preferentially assumes a solid  
216 crystalline-like state. This can hinder liposome formation.<sup>30</sup> We found there was noticeably less residual,  
217 unincorporated lipid that had accumulated at the bottom of the Eppendorf tube after centrifugation when  
218 the sonication time was increased. After 36 minutes there were virtually no traces of detectable lipid present  
219 at the bottom of the tube, however in all cases titanium particles were still present. Regardless of the

220 presence or absence of a visible white pellet after sonication, traces of unincorporated lipid could still be  
221 detected in the DSC, which are highlighted in each figure by a small black arrow. This appears to vary  
222 proportionately with the amount of lipid initially present in the sample.

223 This work, though preliminary, reveals important aspects of liposome preparation that should be addressed  
224 when attempting to establish a reproducible method. Beyond the practical considerations of this work  
225 further studies that probe the biophysical behavior of lipids prepared this way may uncover interesting  
226 phenomena that we never could have predicted similar to the findings herein.

## 227 **Conclusions**

228 We demonstrated in this brief analysis that small changes in the preparation of DPPC liposomes using  
229 probe-tip sonication can affect the thermal transition profile. Differential scanning calorimetry has been  
230 used as a tool to assess liposome stability and measure temperature transition states and here we employ  
231 this as means to assess important parameters that should be considered when attempting to establish robust  
232 and reproducible preparatory methods specifically using probe-tip sonication.<sup>23,26</sup> The appearance of  
233 additional peaks relative to the main transition peak at approximately 41.0 °C suggests the presence of  
234 additional liposomal species or the generation of a polymorphic mixture when lipid concentrations are  
235 increased and sonication times are extended, which has been previously reported for pure DPPC  
236 liposomes.<sup>23</sup>

## 237 **Acknowledgements**

238 The authors acknowledge the support of the Chemistry department.

239

240

241

242

243

244

245

246 **References**

- 247 (1) Giatrellis, S.; Nounesis, G. *J. Pharm. Bioallied Sci.* **2011**, *3* (1), 70.
- 248 (2) Papahadjopoulos, D.; Allen, T. M.; Gabizon, A.; Mayhew, E.; Matthay, K.; Huang, S. K.; Lee, K.  
249 D.; Woodle, M. C.; Lasic, D. D.; Redemann, C. *Proc. Natl. Acad. Sci.* **2006**, *88* (24), 11460-  
250 11464.
- 251 (3) Hussein, G. A.; Pitt, W. G. *Advanced Drug Delivery Reviews.* **2008**, 1137–1152.
- 252 (4) Flaten, G. E.; Bunjes, H.; Luthman, K.; Brandl, M. *Eur. J. Pharm. Sci.* **2006**, *28* (4), 336–343.
- 253 (5) Kono, K. *Advanced Drug Delivery Reviews.* 2001, 307–319.
- 254 (6) Roy, B.; Guha, P.; Bhattarai, R.; Nahak, P.; Karmakar, G.; Chettri, P.; Panda, A. K. *J. Oleo Sci.*  
255 **2016**, *65* (5), 399–411.
- 256 (7) Armengol, X.; Estelrich, J. *J. Microencapsul.* **1995**, *12* (5), 525–535.
- 257 (8) Chen, J.; Cheng, D.; Li, J.; Wang, Y.; Guo, J. X.; Chen, Z. P.; Cai, B. C.; Yang, T. *Drug Dev. Ind.*  
258 *Pharm.* **2013**, *39* (2), 197–204.
- 259 (9) Grit, M.; Crommelin, D. J. A. *Chem. Phys. Lipids* **1993**, *64* (1–3), 3–18.
- 260 (10) Ohtake, S.; Schebor, C.; Palecek, S. P.; De Pablo, J. J. *Biochim. Biophys. Acta - Biomembr.* **2005**,  
261 *1713* (1), 57–64.
- 262 (11) Dwarki, V. J.; Malone, R. W.; Verma, I. M. *Methods Enzymol.* **1993**, *217* (C), 644–654.
- 263 (12) Schäfer, J.; Höbel, S.; Bakowsky, U.; Aigner, A. *Biomaterials* **2010**, *31* (26), 6892–6900.
- 264 (13) Wan, C.; Allen, T. M.; Cullis, P. R. *Drug Delivery and Translational Research.* **2014**, 74–83.
- 265 (14) Michanek, A.; Kristen, N.; Höök, F.; Nylander, T.; Sparr, E. *Biochim. Biophys. Acta - Biomembr.*  
266 **2010**, *1798* (4), 829–838.
- 267 (15) Sebaaly, C.; Jraij, A.; Fessi, H.; Charcosset, C.; Greige-Gerges, H. *Food Chem.* **2015**, *178*, 52–62.
- 268 (16) Laouini, A.; Jaafar-Maalej, C.; Limayem-Blouza, I.; Sfar, S.; Charcosset, C.; Fessi, H. *J. Colloid*  
269 *Sci. Biotechnol.* **2012**, *1* (2), 147–168.
- 270 (17) Lapinski, M. M.; Castro-Forero, A.; Greiner, A. J.; Ofoli, R. Y.; Blanchard, G. J. *Langmuir* **2007**,  
271 *23* (23), 11677–11683.
- 272 (18) Patil, Y. P.; Jadhav, S. *Chemistry and Physics of Lipids.* **2014**, 8–18.
- 273 (19) Jahn, A.; Vreeland, W. N.; Gaitan, M.; Locascio, L. E. *J. Am. Chem. Soc.* **2004**, *126* (9), 2674–  
274 2675.
- 275 (20) Avanti Polar Lipids Inc. Preparing large, unilamellar vesicles by extrusion  
276 [http://avantilipids.com/index.php?option=com\\_content&view=article&id=1600&Itemid=381](http://avantilipids.com/index.php?option=com_content&view=article&id=1600&Itemid=381)  
277 (accessed Dec 11, 2018).
- 278 (21) Spectroscopy, P. C.; Scattering, Q. L.; Motion, B. *Malvern Guid.* **2011**.
- 279 (22) Loura, L. M. S.; Fernandes, F.; Fernandes, A. C.; Ramalho, J. P. P. *Biochim. Biophys. Acta -*  
280 *Biomembr.* **2008**, *1778* (2), 491–501.
- 281 (23) Demetzos, C. *J. Liposome Res.* **2008**, *18* (3), 159–173.

- 282 (24) Hafez, I. M.; Ansell, S.; Cullis, P. R. *Biophys. J.* **2000**, 79 (3), 1438–1446.
- 283 (25) Loura, L. M. S.; Fernandes, F.; Fernandes, A. C.; Ramalho, J. P. P. *Biochim. Biophys. Acta -*  
284 *Biomembr.* **2008**, 1778 (2), 491–501.
- 285 (26) Biltonen, R. L.; Lichtenberg, D. *Chem. Phys. Lipids* **1993**, 64 (1–3), 129–142.
- 286 (27) Michel, R.; Plostica, T.; Abezgauz, L.; Danino, D.; Gradzielski, M. *Soft Matter* **2013**, 9 (16),  
287 4167–4177.
- 288 (28) Akbarzadeh, A.; Rezaei-Sadabady, R.; Davaran, S.; Joo, S. W.; Zarghami, N.; Hanifehpour, Y.;  
289 Samiei, M.; Kouhi, M.; Nejati-Koshki, K. *Nanoscale Res. Lett.* **2013**, 8 (1), 1–8.
- 290 (29) Roces, C. B.; Kastner, E.; Stone, P.; Lowry, D.; Perrie, Y. *Pharmaceutics* **2016**, 8 (3).  
291 doi: 10.3390/pharmaceutics8030029  
292
- 293 (30) Zuo, Y. Y.; Chen, R.; Wang, X.; Yang, J.; Policova, Z.; Neumann, A. W. *Langmuir* **2016**, 32 (33),  
294 8501–8506.

295

296

297

298

299

300

301
